# Supplementary material
Source: PubMed Central journal article supplement (PMC1681463)
Supplement: msb4100012-s1.pdf [file msb4100012-s1.pdf]

**Supplementary Table1:** Summary of the interaction partners and their average protein ratios from at least two pull-down experiments.

| Phosphotyrosine | interaction partner                                | Ratio $\pm$ s.d. | Swiss-Prot Number |
|-----------------|----------------------------------------------------|------------------|-------------------|
| <b>EGFR</b>     |                                                    |                  |                   |
| 727             | Transforming protein Shc                           | 7.5 $\pm$ 1.0    | P29353            |
| 891             | SH3 domain-binding glutamic acid-rich-like protein | 13.7 $\pm$ 7.6   | Q9H299            |
| 978             | STAT5                                              | 9.7 $\pm$ 2.9    | P516981           |
|                 | Protein tyrosine phosphatase 2C                    | 3.1 $\pm$ 1.4    | Q06124            |
| 998             | STAT5                                              | 8.4 $\pm$ 3.0    | P516981           |
|                 | Adapter molecule Crk                               | 4.9 $\pm$ n.a.   | P46108            |
|                 | Protein tyrosine phosphatase 2C                    | 3.8 $\pm$ n.a.   | Q06124            |
|                 | Transforming protein Shc                           | 6.7 $\pm$ 1.0    | P29353            |
|                 | Tyrosine protein kinase Csk                        | 3.1 $\pm$ n.a.   | P41240            |
| 1016            | Protein tyrosine phosphatase 2C                    | 3.6 $\pm$ 1.5    | Q06124            |
| 1069            | Signal transduction protein Cbl-B                  | 19.3 $\pm$ 8.5   | P22681            |
| 1092            | Grb2                                               | 10.3 $\pm$ 2.8   | P29354            |
| 1110            | Grb2                                               | 7.7 $\pm$ 3.0    | P29354            |
|                 | Transforming protein Shc                           | 6.0 $\pm$ 2.8    | P29353            |
| 1125            | Grb2                                               | 13.3 $\pm$ 7.4   | P29354            |
| 1138            | Grb2                                               | 10.5 $\pm$ 3.5   | P29354            |
|                 | Transforming protein Shc                           | 5.7 $\pm$ 1.9    | P29353            |
| 1172            | Grb2                                               | 13.5 $\pm$ 7.8   | P29354            |
|                 | Transforming protein Shc                           | 12.6 $\pm$ 2.3   | P29353            |
| 1197            | Grb2                                               | 9.7 $\pm$ 4.8    | P29354            |
|                 | Transforming protein Shc                           | 7.7 $\pm$ 3.0    | P29353            |

| Phosphotyrosine | interaction partner                                | Ratio $\pm$ s.d. | Swiss-Prot Number |
|-----------------|----------------------------------------------------|------------------|-------------------|
| <b>ErbB2</b>    |                                                    |                  |                   |
| 735             | Transforming protein Shc                           | 6.8 $\pm$ 1.5    | P29353            |
| 923             | SH3 domain-binding glutamic acid-rich-like protein | 5.5 $\pm$ 1.2    | Q9H299            |
| 1005            | Transforming protein Shc                           | 5.6 $\pm$ 2.1    | P29353            |
| 1023            | Protein tyrosine phosphatase 2C                    | 4.3 $\pm$ n.a.   | Q06124            |
| 1139            | Grb2                                               | 6.7 $\pm$ 3.7    | P29354            |
| 1196            | Transforming protein Shc                           | 7.2 $\pm$ 3.1    | P29353            |
|                 | SH3 domain-binding glutamic acid-rich-like protein | 4.1 $\pm$ n.a.   | Q9H299            |
| 1222            | Transforming protein Shc                           | 5.4 $\pm$ 2.3    | P29353            |
| 1248            | Transforming protein Shc                           | 6.7 $\pm$ 1.8    | P29353            |

| Phosphotyrosine | interaction partner                                   | Ratio $\pm$ s.d. | Swiss-Prot Number |
|-----------------|-------------------------------------------------------|------------------|-------------------|
| <b>ErbB3</b>    |                                                       |                  |                   |
| 1054            | Phosphatidylinositol 3-kinase regulatory beta subunit | 11.4 $\pm$ 5.4   | O00459            |
| 1197            | Phosphatidylinositol 3-kinase regulatory beta subunit | 4.7 $\pm$ 2.3    | O00459            |
| 1199            | Grb2                                                  | 13 $\pm$ 4.0     | P29354            |
|                 | Tyrosine protein kinase Csk                           | 6.7 $\pm$ 2.3    | P41240            |
| 1222            | Phosphatidylinositol 3-kinase regulatory beta subunit | 30.0 $\pm$ 4.2   | O00459            |
| 1260            | Phosphatidylinositol 3-kinase regulatory beta subunit | 6.5 $\pm$ 2.8    | O00459            |
| 1262            | Grb2                                                  | 8.3 $\pm$ 3.1    | P29354            |
| 1276            | Phosphatidylinositol 3-kinase regulatory beta subunit | 3.8 $\pm$ 1.9    | O00459            |
| 1289            | Phosphatidylinositol 3-kinase regulatory beta subunit | 20.0 $\pm$ 11.3  | O00459            |
| 1328            | Transforming protein Shc                              | 5.8 $\pm$ 2.3    | P29353            |

| Phosphotyrosine | interaction partner                                   | Ratio $\pm$ s.d. | Swiss-Prot Number |
|-----------------|-------------------------------------------------------|------------------|-------------------|
| <b>ErbB4</b>    |                                                       |                  |                   |
| 733             | Transforming protein Shc                              | 8.3 $\pm$ 2.3    | P29353            |
| 984             | STAT5                                                 | 9.3 $\pm$ 2.8    | P516981           |
|                 | Protein tyrosine phosphatase 2C                       | 3.9 $\pm$ 2.4    | Q06124            |
| 1022            | Adapter molecule Crk                                  | 12.1 $\pm$ 3.2   | P46108            |
| 1056            | Phosphatidylinositol 3-kinase regulatory beta subunit | 30 $\pm$ n.a.    | O00459            |
| 1162            | Grb2                                                  | 5.8 $\pm$ 2.7    | P29354            |
| 1188            | Grb2                                                  | 30 $\pm$ n.a.    | P29354            |
|                 | Transforming protein Shc                              | 5.3 $\pm$ 1.6    | P29353            |
| 1202            | Grb2                                                  | 6.3 $\pm$ 1.0    | P29354            |
| 1208            | Grb2                                                  | 3.8 $\pm$ 2.1    | P29354            |
| 1221            | Grb2                                                  | 4.8 $\pm$ 2.3    | P29354            |
| 1242            | Grb2                                                  | 8.2 $\pm$ 1.7    | P29354            |
|                 | Transforming protein Shc                              | 5.6 $\pm$ n.a.   | P29353            |
| 1268            | Grb2                                                  | 3.5 $\pm$ 1.5    | P29354            |
|                 | Nck adapter protein 2                                 | 5.0 $\pm$ 2.2    | O43639            |
| 1284            | Transforming protein Shc                              | 4.1 $\pm$ 1.4    | P29353            |
