# Supplementary material
Source: PubMed Central journal article supplement (PMC1681463)
Supplement: msb4100012-s2.pdf [file msb4100012-s2.pdf]

### **Supplementary Figure 1:**

Hierarchical clustering of the expression of the four ErbB-family members in 159 samples of 79 tissues. Expression data were obtained from a large-scale analysis of the human transcriptome using the Affymetrix Gene Chip Human Genome U133 Array (Set HG-U133A) (Accession GDS596 at Gene Expression Omnibus). Expression data for the four ErbB-family members were extracted from the whole dataset and hierarchical clustering was achieved using the DNA-chip analyzer software Dchip (<http://www.dchip.org/>).

The figure shows that EGFR and ErbB4 are rarely co-expressed, ErbB2 and ErbB3 seldom are expressed without either EGFR or ErbB4. EGFR and ErbB4 can be expressed alone, and in a few tissues ErbB2 is also expressed alone.
